# Supplementary material for: Synthesis and hydrogen evolving catalysis of a panchromatic photochemical molecular device
Source: Royal Society of Chemistry journal article supplement (doi:10.1039/c9se00304e), 2019-09-05

## Synthesis and Hydrogen Evolving Catalysis of a Panchromatic Photochemical Molecular Device

Johannes Habermehl,<sup>†a</sup> Djawed Nauroozi,<sup>†a</sup> Miłosz Martynow,<sup>b</sup> Yury E. Vilk,<sup>c</sup> Radim Beranek,<sup>c</sup> Julien Guthmüller,<sup>b</sup> Sven Rau<sup>\*a</sup>

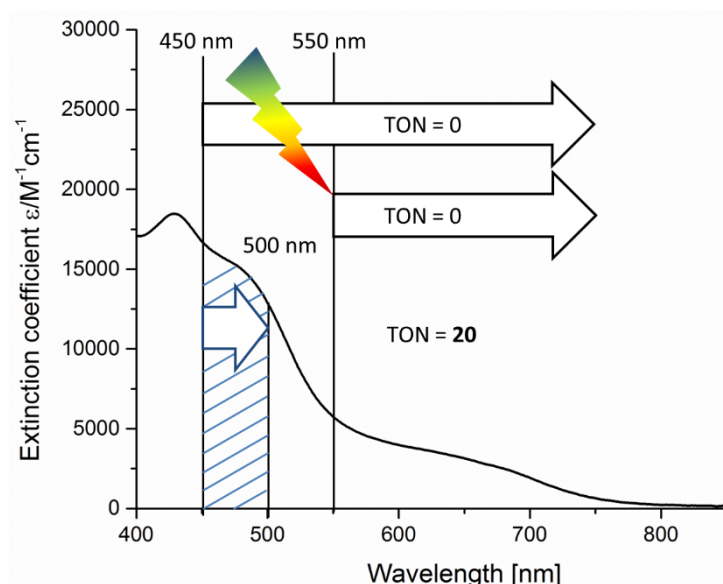

### Table of Contents

|                             |     |
|-----------------------------|-----|
| Experimental Part           | p2  |
| Synthetic Procedures        | p3  |
| NMR Spectra                 | p3  |
| Mass spectrometry           | p6  |
| Photocatalytic Activity     | p7  |
| Absorption Spectra          | p8  |
| Cyclic voltammetry          | p9  |
| Spectroelectrochemical Data | p10 |
| Irradiation Setup           | p11 |
| DFT Calculations            | p12 |

## Experimental Part

### Materials and Devices

The synthesis of **Ostpphz** is described elsewhere.<sup>[7]</sup> The syntheses of the sacrificial electron donors BIH and BNAH were performed following literature procedures with minor variations.<sup>[10]</sup> Acetonitrile was purchased from VWR (HPLC grade) and purified with a MBraun MB-SPS-800 solvent drying system. Triethylamine was purchased from Carl Roth (spectroscopic grade). <sup>1</sup>H and <sup>13</sup>C NMR spectra were recorded with a Bruker 400 MHz spectrometer, UV-Vis spectra with a Jasco V-670 Spectrophotometer. ESI mass spectra were recorded with a Bruker solariX hybrid 7T FT-ICR. Chromatograms were on a Bruker Scion SQ gaschromatograph with a Restek ShinCarbon ST column with different mixtures of hydrogen and argon as reference.

### Photocatalytical measurements

Photocatalytic experiments were carried out in a home-built air-cooling apparatus for maintaining 25 °C under constant irradiation of a Schlenk-vessel (ESI S9). All samples were prepared under inert conditions, dried and degassed (1 min per 1 mL) acetonitrile and degassed demineralized water was used. Concentration of the mixtures was  $1.08 \times 10^{-5}$  mol/L for **OsPt** and  $1.08 \times 10^{-2}$  mol/L for the electron donors in 10 mL catalytic mixtures. In addition the samples were prepared in schlenk-tubes with a headspace-solution ratio of 11/10 in the dark under argon stream. As light sources two blue LED lights (each 470 nm  $\pm$  15 nm, P = 35 mW  $\pm$  5 mW) were used. After specific time, 100  $\mu$ L samples were drawn from the headspace and injected immediately into the GC apparatus. Hydrogen measurements and irradiation experiments were performed several times.

For the excitation with a broad band light source, some changes of the conditions above were made. Due to a different reactor geometry, 20 mL of the catalytic mixtures were used and the headspace-solution ratio was 11/20 (see ESI S8). The used light-source was a 150 W Xe lamp from LOT Oriel, with cut-off filters at > 450 nm, > 550 nm and < 500 nm purchased from Edmund optics.

### UV-Vis measurements under catalytic conditions

The catalytic mixture was prepared as mentioned before and transferred to an UV-Vis cuvette. The sample was irradiated with a LED light stick (470 nm  $\pm$  15 nm, P = 35 mW  $\pm$  5 mW) in an apparatus with vents for remaining room temperature (25° C). After certain amounts of time an UV-Vis spectrum was measured with a mixture of acetonitrile: water (9:1) as a baseline.

### Theoretical Section

To reduce the computational cost of the calculations without affecting the spectroscopic properties, the structure of the complexes were simplified by replacing the *tert*-butyl groups by methyl groups. The geometries of the singlet ground state were calculated by means of density functional theory (DFT) with the functional B3LYP. Harmonic vibrational frequencies were computed to confirm that the optimized structures correspond to minima on the potential energy surface. The 28-electron, 46-electron and 60-electron relativistic effective core potentials MWB were used with their basis sets for the ruthenium, iodine, osmium and platinum atoms, respectively. The 6-31G(d) basis set was employed for the ligands. The vertical excitation energies of the singlet and triplet excited states were obtained from time-dependent (TD) DFT calculations with the same functional, pseudopotential and basis set. The effects of the interaction with a solvent (acetonitrile,  $\epsilon$  = 35.688,  $n$  = 1.344) on the

geometries and excitation energies were taken into account by the polarizable continuum model (PCM). The nonequilibrium procedure of solvation was used for the calculation of the excitation energies. All the computations were performed with Gaussian 09<sup>[18]</sup>.

## Synthetic Procedures

**[Os(tbbpy)<sub>2</sub>(tpphz)PtI<sub>2</sub>](PF<sub>6</sub>)<sub>2</sub> (OsPt).** [Os(tbbpy)<sub>2</sub>(tpphz)](PF<sub>6</sub>)<sub>2</sub> (76.0 mg, 54.2 μmol) and (DMSO)<sub>2</sub>PtI<sub>2</sub> (50.0 mg, 82.26 μmol) were suspended in ethanol (100 mL) and heated at 85 °C for 18 h. The volume of the resulting black solution was concentrated to one third (ca. 30 mL) with the rotary evaporator and treated with a saturated solution of (NH<sub>4</sub>)(PF<sub>6</sub>) in water. The precipitate was washed with water (100 mL) and diethyl ether (20 mL). Yield was 78 % (78 mg). <sup>1</sup>H NMR (400 MHz, DMSO-d<sub>6</sub>) δ [ppm]: 10.03 (s, 2H), 9.85 (d, *J* = 7.6 Hz, 2H), 9.79 (d, *J* = 7.6 Hz, 2H), 8.93 (s, 2H), 8.88 (s, 2H), 8.43 - 8.31 (m, 2H), 8.25 (d, *J* = 4.5 Hz, 2H), 8.18 - 8.08 (m, 2H), 7.75 (s, 2H), 7.67 (d, *J* = 5.5 Hz, 2H), 7.61 (d, *J* = 4.6 Hz, 2H), 7.32 (d, *J* = 4.9 Hz, 2H), 1.47 (s, 18H), 1.35 (s, 18H). <sup>13</sup>C NMR (500 MHz, DMSO-d<sub>6</sub>) δ [ppm]: 161.93, 161.41, 158.71, 158.39, 153.90, 153.39, 153.12, 151.64, 150.36, 149.31, 141.73, 138.12, 136.53, 134.12, 130.64, 129.03, 128.85, 128.67, 125.75, 125.63, 122.56, 122.44, 35.89, 35.74, 30.75, 30.59 MS (ESI): 780.11 ([M-2PF<sub>6</sub>]<sup>2+</sup>)

## NMR Spectra

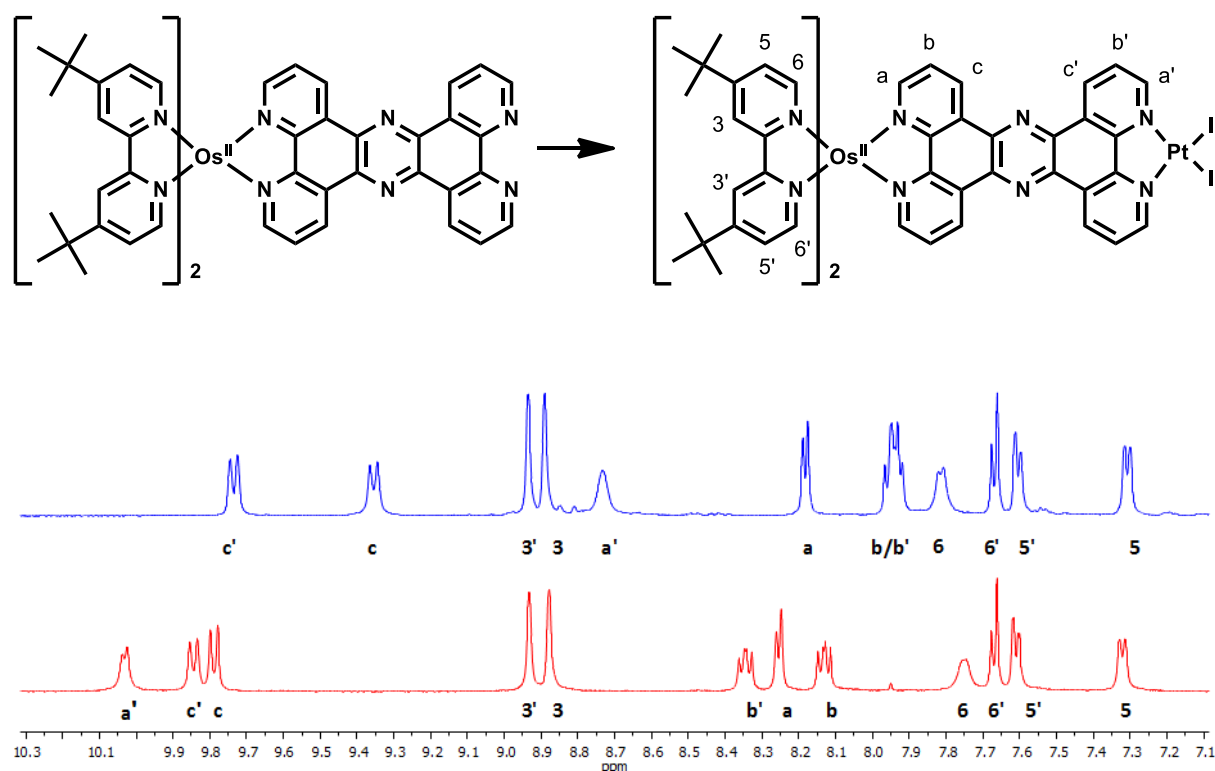

**Figure S1.** Structures and assignments of the <sup>1</sup>H NMR signals for **Ostpphz** and **OsPt**. <sup>1</sup>H NMR spectra of the aromatic regions of **Ostpphz** (blue) and **OsPt** (red) at the same concentrations (8 × 10<sup>-4</sup> mol/L) in DMSO-d<sub>6</sub>.

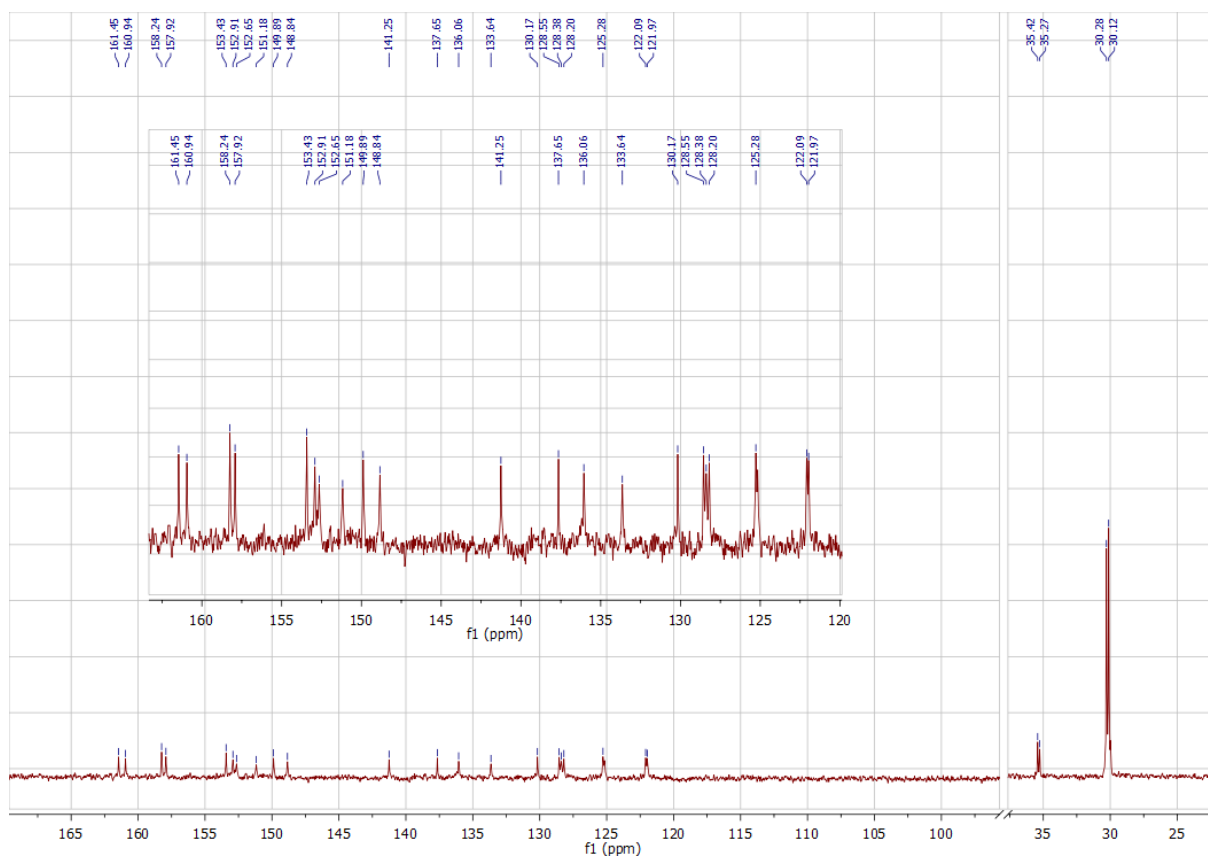

**Figure S2.**  $^{13}\text{C}$  NMR spectrum of **OsPt** in DMSO- $d_6$ .

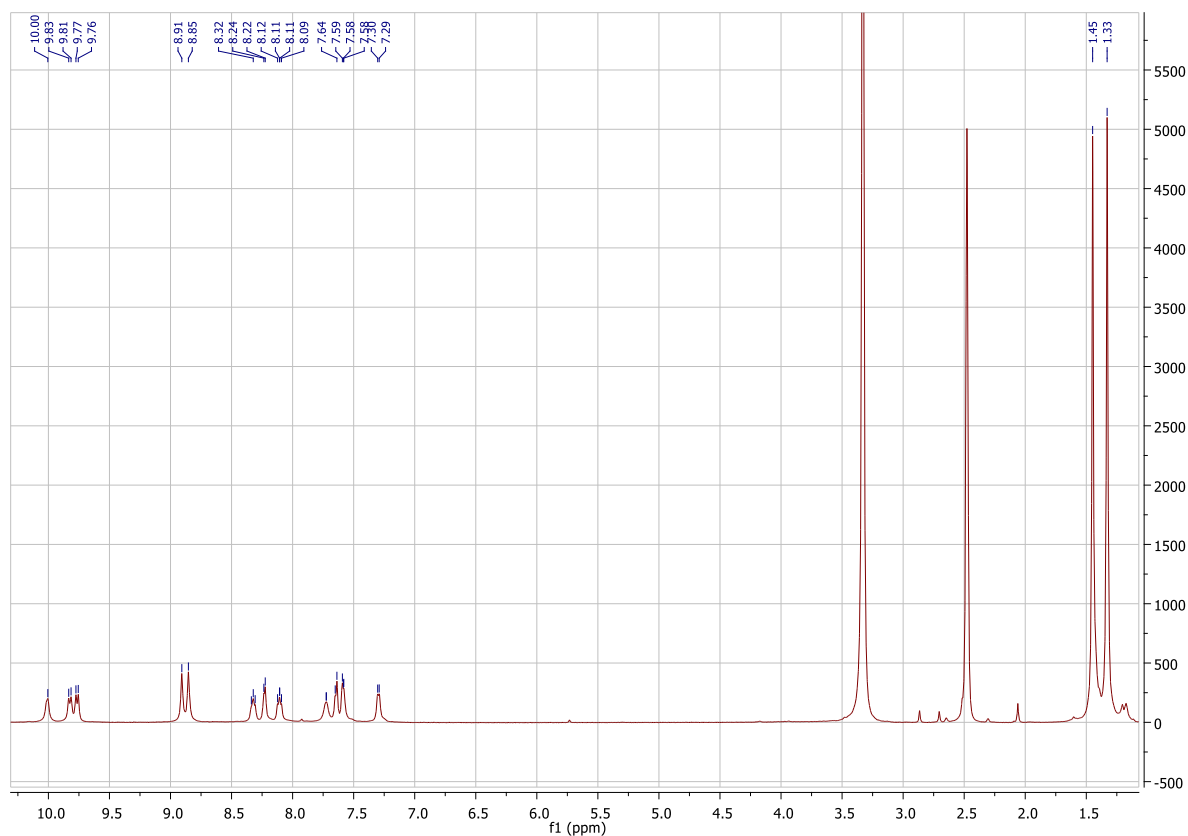

**Figure S3.**  $^1\text{H}$  NMR spectrum of **OsPt** in DMSO- $d_6$  at a concentration of  $8 \times 10^{-4}$  mol/L.

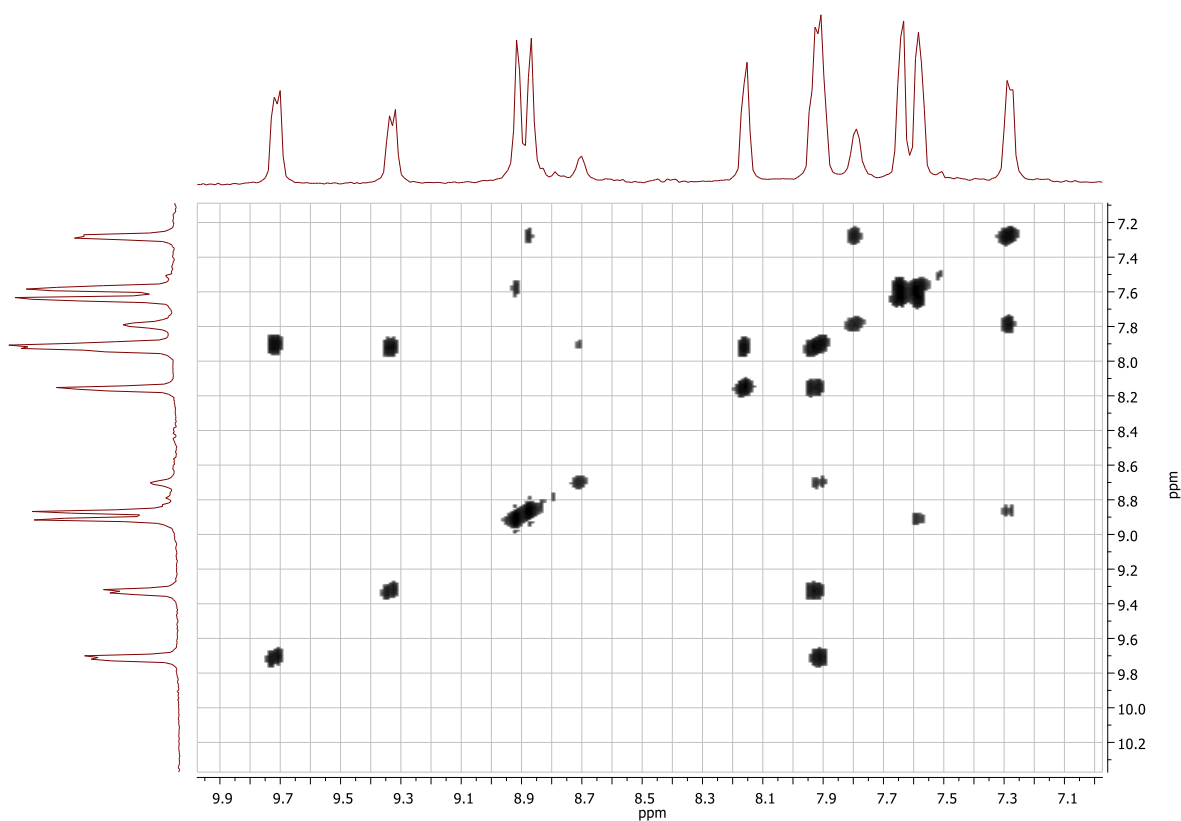

**Figure S4.** H-H COSY spectrum of **OsPt** in DMSO- $d_6$  at a concentration of  $8 \times 10^{-4}$  mol/L.

## Mass Spectrometry

MS: ESI – positive mode

Method ESI pos 100\_800  
Sample Name JJ12  
Comment LM: ACN

Operator  
Instrument solariX

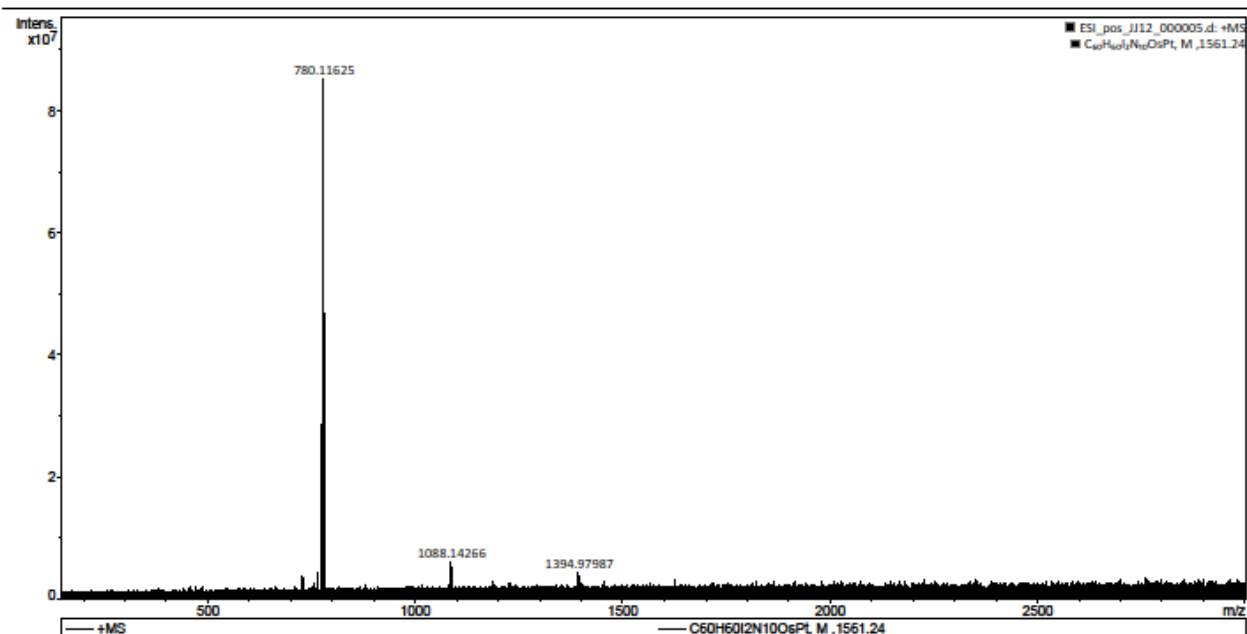

Method ESI pos 100\_800  
Sample Name JJ12  
Comment LM: ACN

Operator  
Instrument solariX

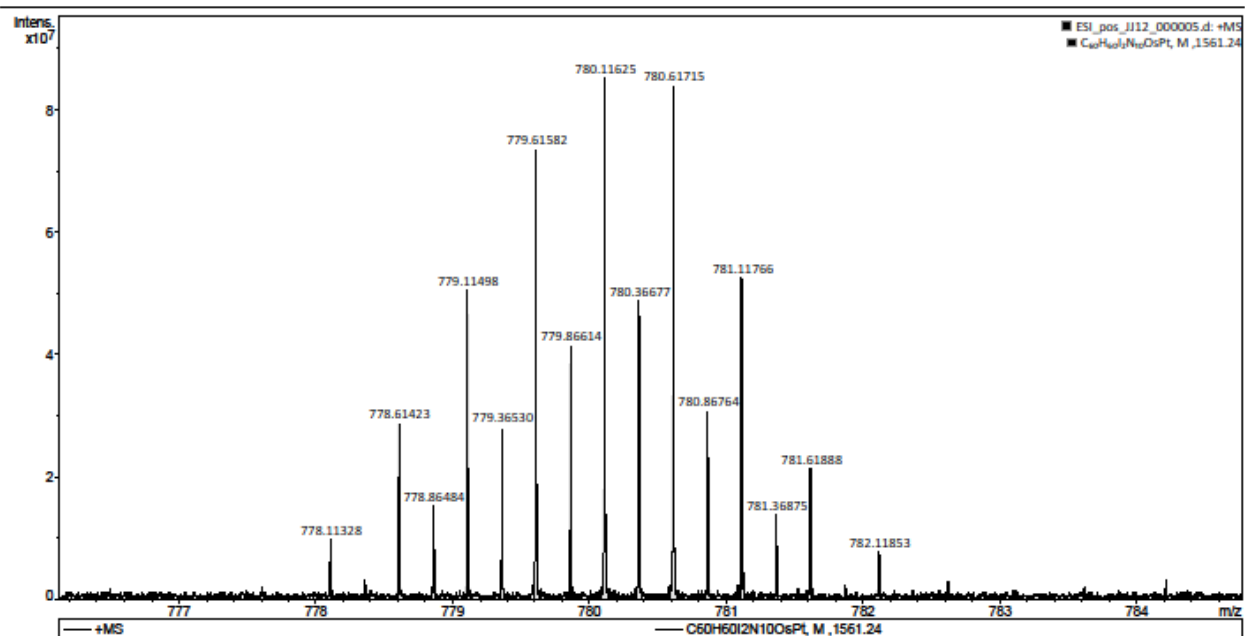

## Photocatalytic Activity

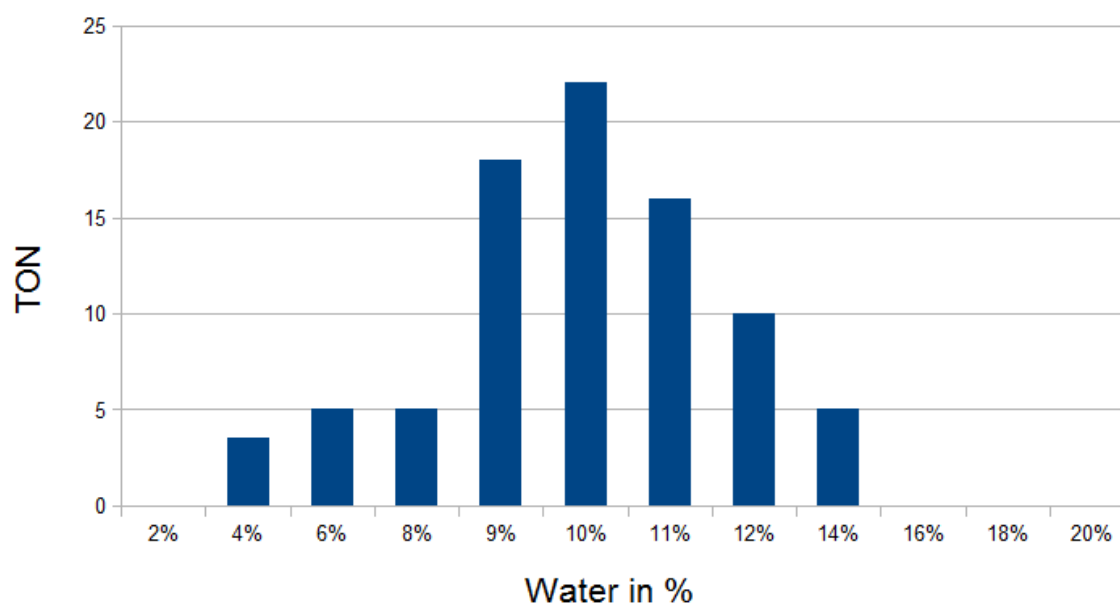

**Figure S5.** Photo catalytic activity of **OsPt** in relation with water content (BNAH as  $e^-$  donor).

## Absorption Spectra

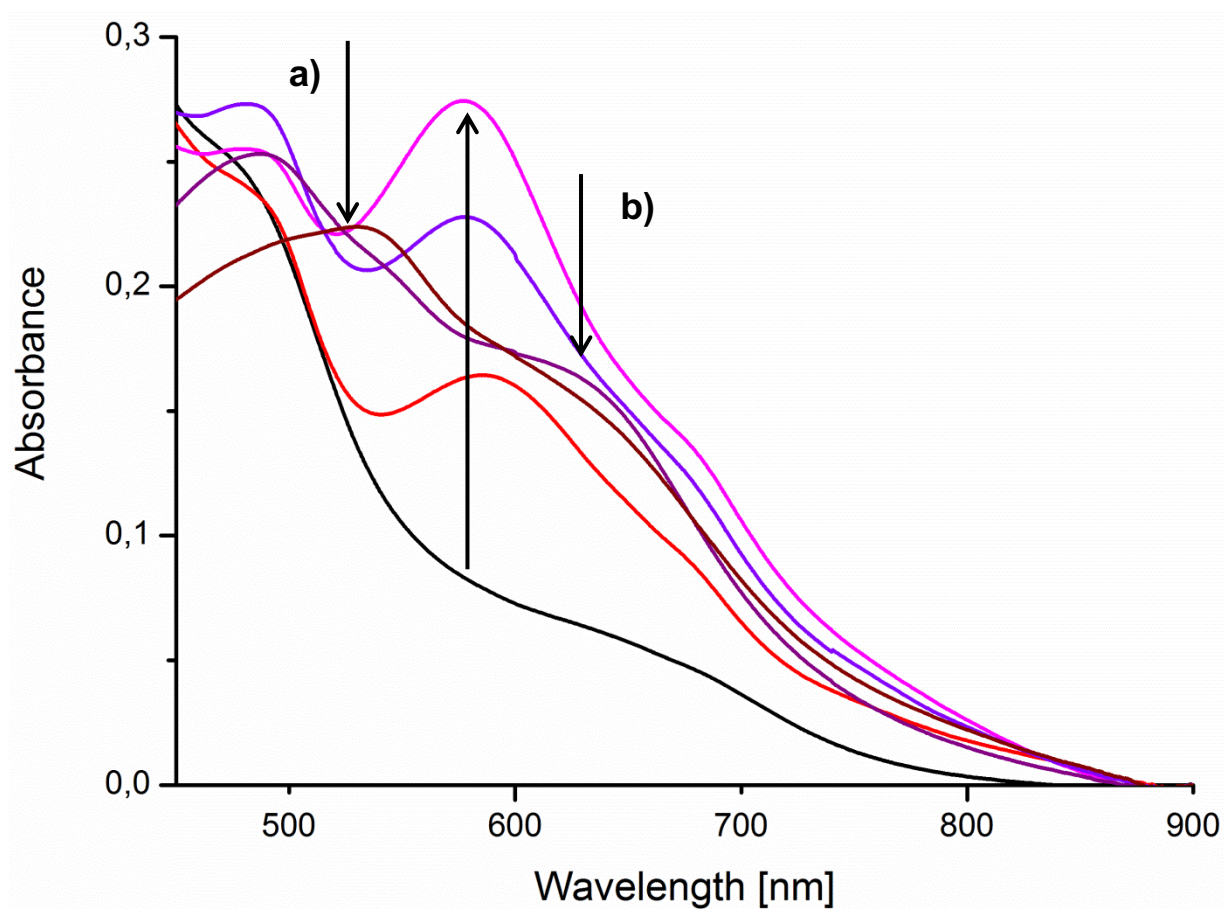

**Figure S6.** UV-Vis in the catalytic mixture with irradiation at 470 nm. Spectra at different times of irradiation. Starting with the black spectrum without irradiation a band emerges at 590 nm (orange spectrum, 15 min; violet, 45 min) with a maximum intensity after 2h (pink). After completion of the catalysis two bands appear, one at 520 nm (a) and a second at 640 nm (b).



## Cyclic voltammetry

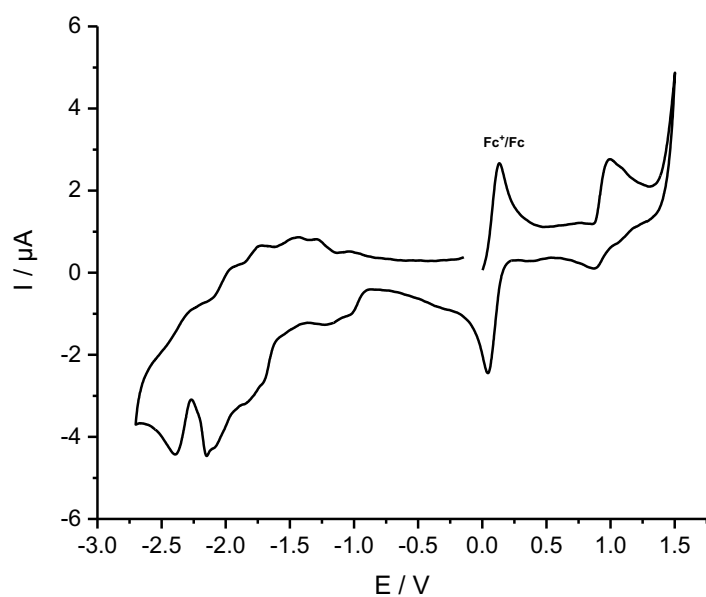

**Figure S7:** Cyclic voltammogram of RuPt in MeCN containing  $n\text{Bu}_4\text{NPF}_6$  as electrolyte with a glassy carbon electrode as working electrode, Ag/AgCl as reference electrode and Pt wire as counter electrode. Scan rate:  $100 \text{ mV s}^{-1}$ . All data are referenced against  $\text{Fc}^+/\text{Fc}$ .

## Spectroelectrochemical Data

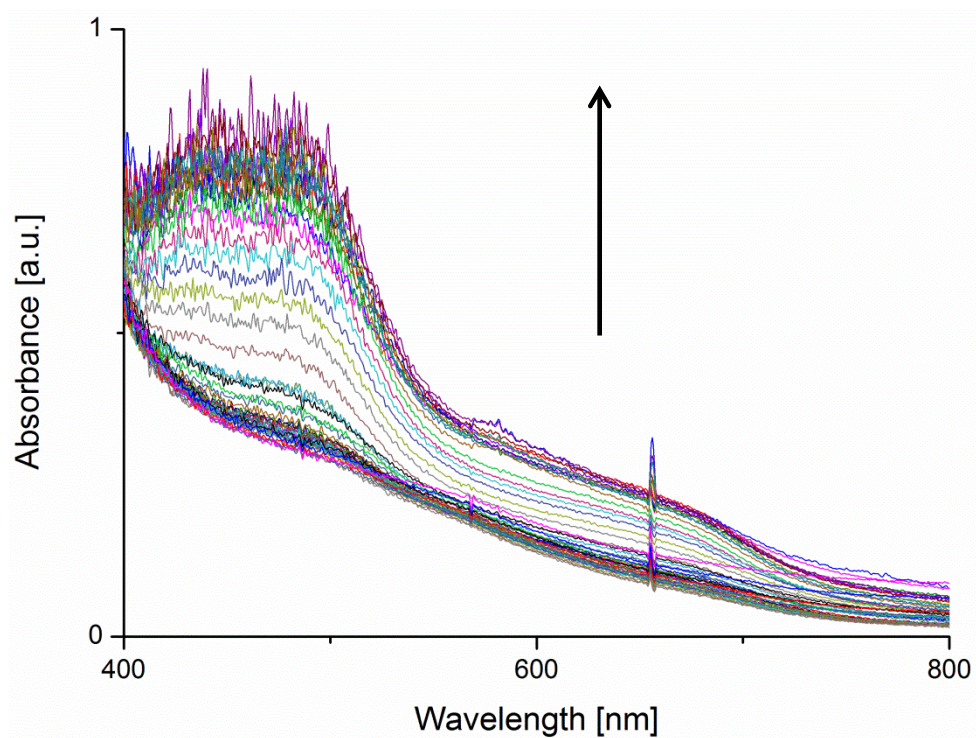

Figure S8. Spectroelectrochemistry of **Ostpphz** (reduction).

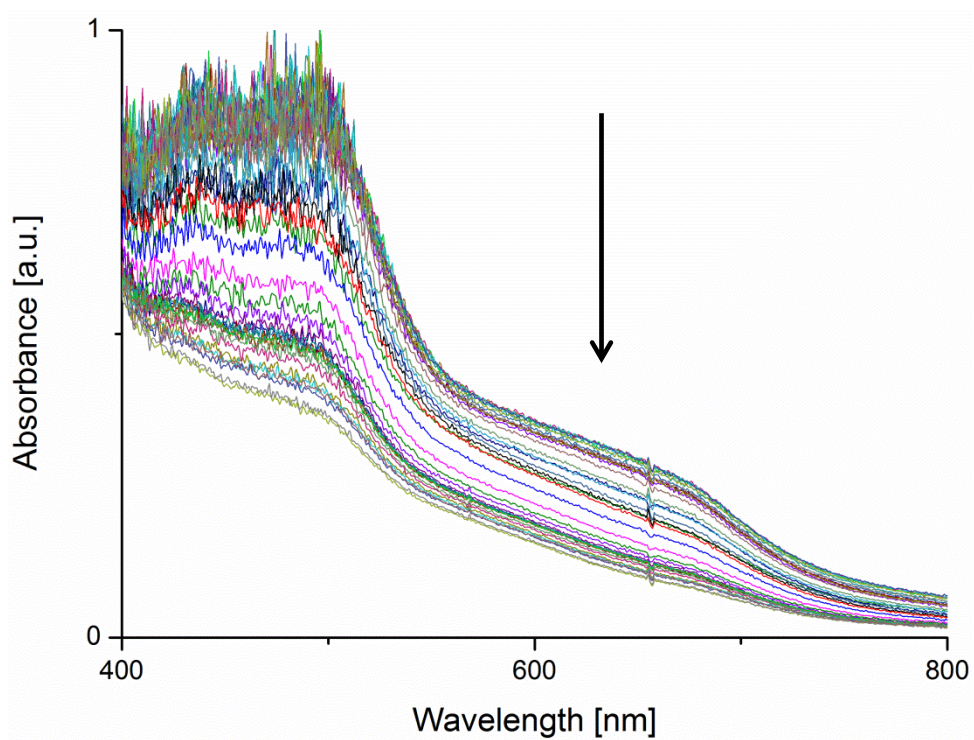

Figure S9. Spectroelectrochemistry of **Ostpphz** (re-oxidation).

## Irradiation Setup

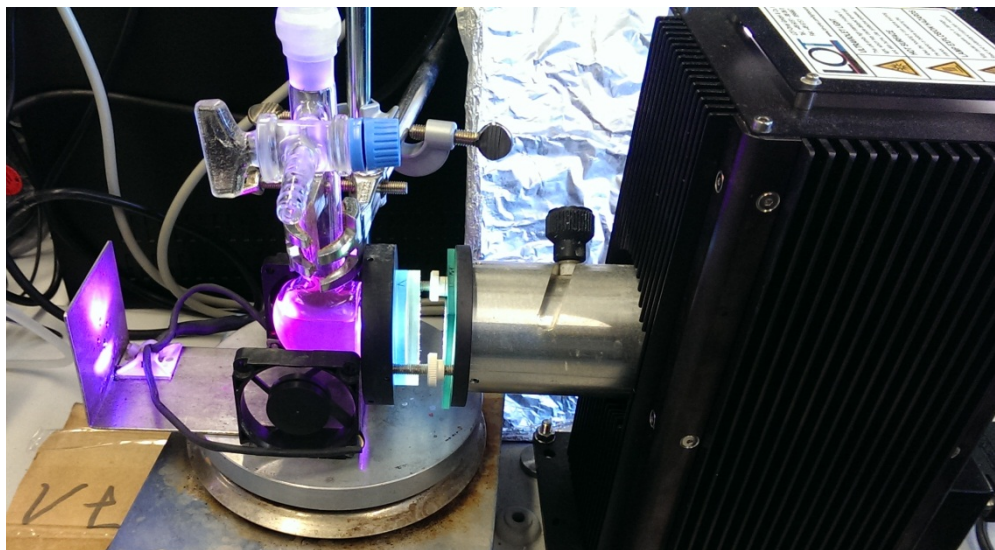

**Figure S10.** Setting for irradiation with a 150 W Xenon lamp with different cut-off filters.

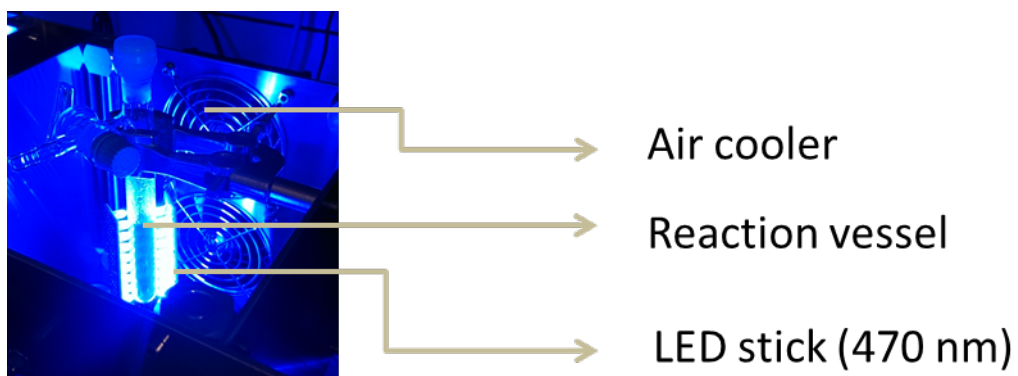

**Figure S11.** Apparatus for irradiation with blue light (470 nm).

## DFT Calculations

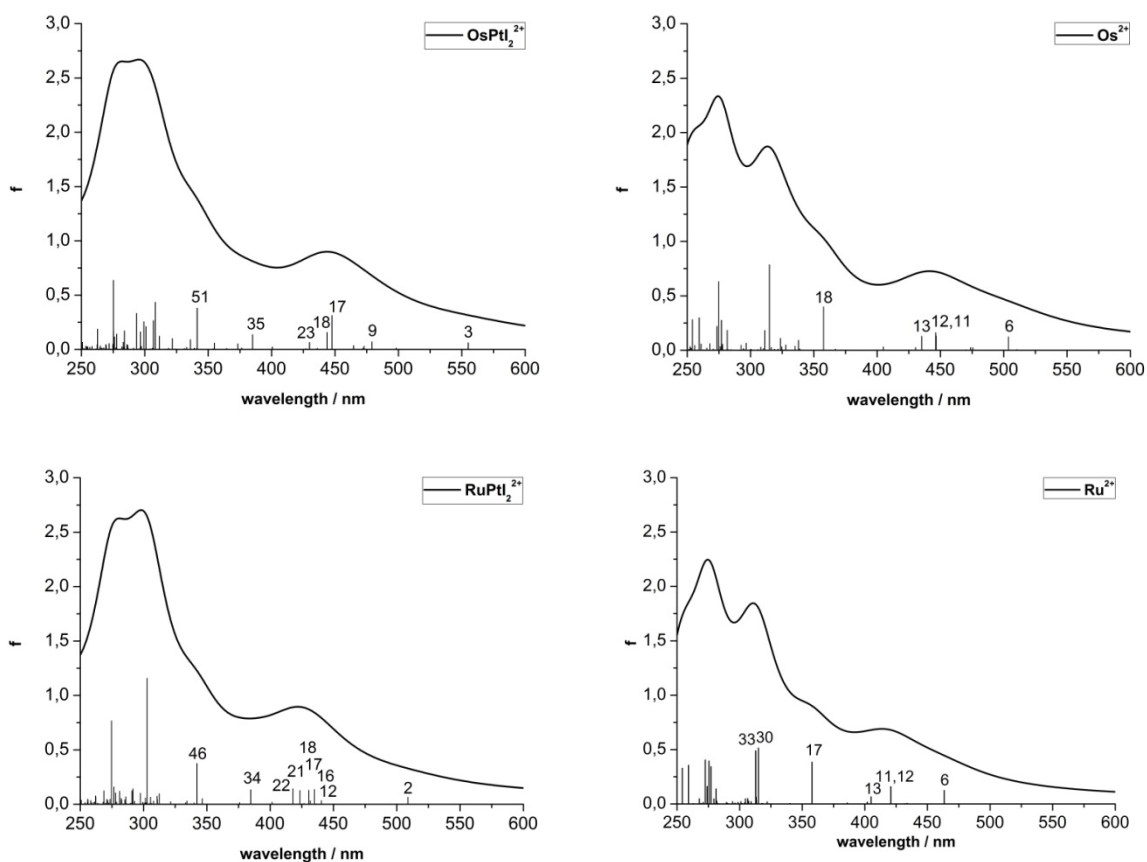

**Figure S12.** Calculated absorption spectra of OsPt, Ostpphz, RuPt and Rutpphz

**Table S1.** Calculated singlet excited state properties of OsPt

| State number | Transition | Weight (%) | $E^e$ (eV) | $\lambda$ (nm) | f     | $\langle S^2 \rangle$ |
|--------------|------------|------------|------------|----------------|-------|-----------------------|
| S3           | 218 -> 221 | 93         | 2.23       | 555            | 0.061 | 0.000                 |
| S8           | 219 -> 224 | 79         | 2.49       | 498            | 0.014 | 0.000                 |
|              | 219 -> 226 | 9          |            |                |       |                       |
|              | 219 -> 221 | 8          |            |                |       |                       |
| S9           | 218 -> 224 | 60         | 2.59       | 479            | 0.071 | 0.000                 |
|              | 219 -> 223 | 22         |            |                |       |                       |
|              | 218 -> 226 | 10         |            |                |       |                       |
| S10          | 219 -> 223 | 68         | 2.62       | 472            | 0.030 | 0.000                 |
|              | 218 -> 226 | 13         |            |                |       |                       |
|              | 218 -> 224 | 12         |            |                |       |                       |
| S11          | 219 -> 226 | 42         | 2.63       | 472            | 0.013 | 0.000                 |
|              | 218 -> 227 | 32         |            |                |       |                       |
|              | 218 -> 223 | 15         |            |                |       |                       |
|              | 219 -> 224 | 8          |            |                |       |                       |
| S15          | 218 -> 223 | 78         | 2.67       | 464            | 0.035 | 0.000                 |
|              | 219 -> 226 | 8          |            |                |       |                       |
|              | 218 -> 227 | 5          |            |                |       |                       |

|     |                                     |                |      |     |       |       |
|-----|-------------------------------------|----------------|------|-----|-------|-------|
| S17 | 219 ->227<br>218 ->226<br>218 ->224 | 46<br>29<br>14 | 2.77 | 447 | 0.312 | 0.000 |
| S18 | 218 ->227<br>219 ->226              | 60<br>34       | 2.79 | 443 | 0.157 | 0.000 |
| S21 | 218 ->222<br>215 ->225              | 82<br>9        | 2.84 | 436 | 0.011 | 0.000 |
| S23 | 215 ->221                           | 88             | 2.88 | 429 | 0.065 | 0.000 |
| S31 | 216 ->225                           | 94             | 3.10 | 400 | 0.025 | 0.000 |
| S35 | 215 ->222<br>217 ->223              | 68<br>21       | 3.22 | 384 | 0.138 | 0.000 |
| S38 | 215 ->223                           | 93             | 3.29 | 376 | 0.015 | 0.000 |
| S39 | 220 ->228                           | 84             | 3.32 | 373 | 0.053 | 0.000 |
| S41 | 220 ->229                           | 96             | 3.40 | 364 | 0.010 | 0.000 |
| S44 | 219 ->228                           | 90             | 3.49 | 354 | 0.059 | 0.000 |
| S51 | 209 ->221<br>212 ->221<br>210 ->223 | 61<br>21<br>9  | 3.63 | 341 | 0.381 | 0.000 |

**Table S2.** Calculated triplet excited state properties of **OsPt**

| State number | Transition                                       | Weight (%)           | $E^e$ (eV) | $\lambda$ (nm) | f     | $\langle S^2 \rangle$ |
|--------------|--------------------------------------------------|----------------------|------------|----------------|-------|-----------------------|
| T1           | 220 ->221<br>220 ->224<br>220 ->226              | 58<br>26<br>9        | 1.96       | 633            | 0.000 | 2.000                 |
| T2           | 217 ->225<br>213 ->225<br>208 ->225              | 62<br>20<br>8        | 2.11       | 586            | 0.000 | 2.000                 |
| T3           | 218 ->221<br>218 ->224<br>218 ->226              | 34<br>28<br>20       | 2.12       | 585            | 0.000 | 2.000                 |
| T4           | 220 ->221<br>220 ->224<br>220 ->226              | 33<br>31<br>9        | 2.12       | 585            | 0.000 | 2.000                 |
| T5           | 213 ->225<br>217 ->225<br>214 ->225              | 61<br>19<br>13       | 2.14       | 580            | 0.000 | 2.000                 |
| T6           | 218 ->221<br>220 ->223<br>218 ->224<br>218 ->226 | 49<br>12<br>12<br>11 | 2.20       | 563            | 0.000 | 2.000                 |
| T7           | 219 ->221<br>220 ->224<br>219 ->224<br>220 ->226 | 56<br>14<br>11<br>9  | 2.20       | 562            | 0.000 | 2.000                 |
| T8           | 220 ->226<br>219 ->221<br>220 ->224              | 57<br>21<br>12       | 2.22       | 558            | 0.000 | 2.000                 |
| T9           | 220 ->227                                        | 85                   | 2.24       | 553            | 0.000 | 2.000                 |
| T10          | 215 ->225<br>205 ->225                           | 85<br>11             | 2.30       | 538            | 0.000 | 2.000                 |

**Table S3.** Calculated singlet excited state properties of **OstpPhz**

| State number | Transition | Weight (%) | $E^e$ (eV) | $\lambda$ (nm) | f     | $\langle S^2 \rangle$ |
|--------------|------------|------------|------------|----------------|-------|-----------------------|
| S6           | 202 ->205  | 80         | 2.46       | 503            | 0.124 | 0.000                 |
|              | 202 ->206  | 14         |            |                |       |                       |
| S8           | 203 ->206  | 41         | 2.61       | 475            | 0.025 | 0.000                 |
|              | 202 ->209  | 31         |            |                |       |                       |
|              | 203 ->208  | 19         |            |                |       |                       |
| S9           | 204 ->207  | 47         | 2.62       | 473            | 0.026 | 0.000                 |
|              | 202 ->206  | 24         |            |                |       |                       |
|              | 202 ->208  | 21         |            |                |       |                       |
| S11          | 203 ->207  | 30         | 2.78       | 446            | 0.132 | 0.000                 |
|              | 203 ->209  | 28         |            |                |       |                       |
|              | 202 ->208  | 19         |            |                |       |                       |
|              | 202 ->206  | 13         |            |                |       |                       |
| S12          | 202 ->209  | 49         | 2.78       | 446            | 0.163 | 0.000                 |
|              | 203 ->208  | 41         |            |                |       |                       |
| S13          | 203 ->207  | 60         | 2.85       | 435            | 0.130 | 0.000                 |
|              | 203 ->209  | 30         |            |                |       |                       |
| S14          | 202 ->207  | 92         | 2.88       | 430            | 0.026 | 0.000                 |
| S15          | 202 ->208  | 47         | 3.06       | 404            | 0.031 | 0.000                 |
|              | 203 ->209  | 26         |            |                |       |                       |
|              | 203 ->207  | 5          |            |                |       |                       |
| S16          | 204 ->211  | 97         | 3.38       | 367            | 0.010 | 0.000                 |
| S18          | 200 ->205  | 85         | 3.47       | 357            | 0.400 | 0.000                 |
|              | 201 ->207  | 10         |            |                |       |                       |

**Table S4.** Calculated singlet excited state properties of **RuPt**

| State number | Transition | Weight (%) | $E^e$ (eV) | $\lambda$ (nm) | f     | $\langle S^2 \rangle$ |
|--------------|------------|------------|------------|----------------|-------|-----------------------|
| S2           | 218 ->221  | 95         | 2.44       | 508            | 0.065 | 0.000                 |
| S12          | 219 ->223  | 70         | 2.81       | 440            | 0.034 | 0.000                 |
|              | 218 ->224  | 21         |            |                |       |                       |
| S16          | 218 ->224  | 39         | 2.85       | 434            | 0.137 | 0.000                 |
|              | 218 ->226  | 32         |            |                |       |                       |
|              | 219 ->223  | 16         |            |                |       |                       |
| S17          | 218 ->223  | 56         | 2.87       | 431            | 0.032 | 0.000                 |
|              | 219 ->226  | 22         |            |                |       |                       |
|              | 218 ->227  | 14         |            |                |       |                       |
| S18          | 215 ->221  | 81         | 2.88       | 430            | 0.129 | 0.000                 |
|              | 218 ->226  | 7          |            |                |       |                       |
| S21          | 219 ->227  | 39         | 2.93       | 423            | 0.128 | 0.000                 |
|              | 218 ->226  | 23         |            |                |       |                       |
|              | 218 ->224  | 19         |            |                |       |                       |
|              | 219 ->223  | 7          |            |                |       |                       |
|              | 215 ->221  | 5          |            |                |       |                       |
| S22          | 218 ->227  | 53         | 2.97       | 418            | 0.144 | 0.000                 |
|              | 219 ->226  | 42         |            |                |       |                       |
| S29          | 216 ->225  | 96         | 3.09       | 401            | 0.021 | 0.000                 |
| S34          | 215 ->222  | 72         | 3.22       | 384            | 0.134 | 0.000                 |
|              | 217 ->223  | 22         |            |                |       |                       |
| S35          | 215 ->223  | 94         | 3.30       | 375            | 0.016 | 0.000                 |
| S45          | 220 ->228  | 88         | 3.58       | 346            | 0.052 | 0.000                 |
| S46          | 210 ->221  | 61         | 3.62       | 342            | 0.376 | 0.000                 |
|              | 212 ->221  | 23         |            |                |       |                       |

|  |           |   |  |  |  |  |
|--|-----------|---|--|--|--|--|
|  | 209 ->223 | 9 |  |  |  |  |
|--|-----------|---|--|--|--|--|

**Table S5.** Calculated singlet excited state properties of **Rutpphz**

| State number | Transition | Weight (%) | $E^e$ (eV) | $\lambda$ (nm) | f     | $\langle S^2 \rangle$ |
|--------------|------------|------------|------------|----------------|-------|-----------------------|
| S6           | 203 ->205  | 82         | 2.68       | 463            | 0.126 | 0.000                 |
|              | 203 ->206  | 11         |            |                |       |                       |
| S11          | 203 ->206  | 34         | 2.95       | 420            | 0.160 | 0.000                 |
|              | 202 ->209  | 25         |            |                |       |                       |
|              | 202 ->207  | 18         |            |                |       |                       |
|              | 203 ->205  | 7          |            |                |       |                       |
|              | 203 ->208  | 6          |            |                |       |                       |
|              | 204 ->207  | 5          |            |                |       |                       |
| S12          | 202 ->208  | 47         | 2.95       | 420            | 0.158 | 0.000                 |
|              | 203 ->209  | 39         |            |                |       |                       |
|              | 202 ->206  | 5          |            |                |       |                       |
|              | 203 ->207  | 5          |            |                |       |                       |
| S13          | 202 ->207  | 66         | 3.06       | 404            | 0.067 | 0.000                 |
|              | 202 ->209  | 28         |            |                |       |                       |
| S14          | 203 ->207  | 83         | 3.09       | 401            | 0.018 | 0.000                 |
|              | 203 ->209  | 12         |            |                |       |                       |
| S17          | 200 ->205  | 86         | 3.47       | 357            | 0.386 | 0.000                 |
|              | 201 ->207  | 10         |            |                |       |                       |
| S25          | 202 ->211  | 90         | 3.85       | 322            | 0.021 | 0.000                 |
| S30          | 204 ->214  | 44         | 3.94       | 315            | 0.533 | 0.000                 |
|              | 201 ->207  | 32         |            |                |       |                       |
| S31          | 204 ->215  | 74         | 3.96       | 313            | 0.025 | 0.000                 |
|              | 201 ->206  | 7          |            |                |       |                       |
| S32          | 201 ->206  | 42         | 3.96       | 313            | 0.074 | 0.000                 |
|              | 200 ->207  | 14         |            |                |       |                       |
|              | 195 ->205  | 13         |            |                |       |                       |
|              | 204 ->215  | 12         |            |                |       |                       |
| S33          | 201 ->207  | 41         | 3.96       | 312            | 0.474 | 0.000                 |
|              | 204 ->214  | 19         |            |                |       |                       |
|              | 202 ->213  | 7          |            |                |       |                       |
|              | 200 ->205  | 5          |            |                |       |                       |
|              | 202 ->214  | 5          |            |                |       |                       |



**Table S6.** Orbitals of OsPt

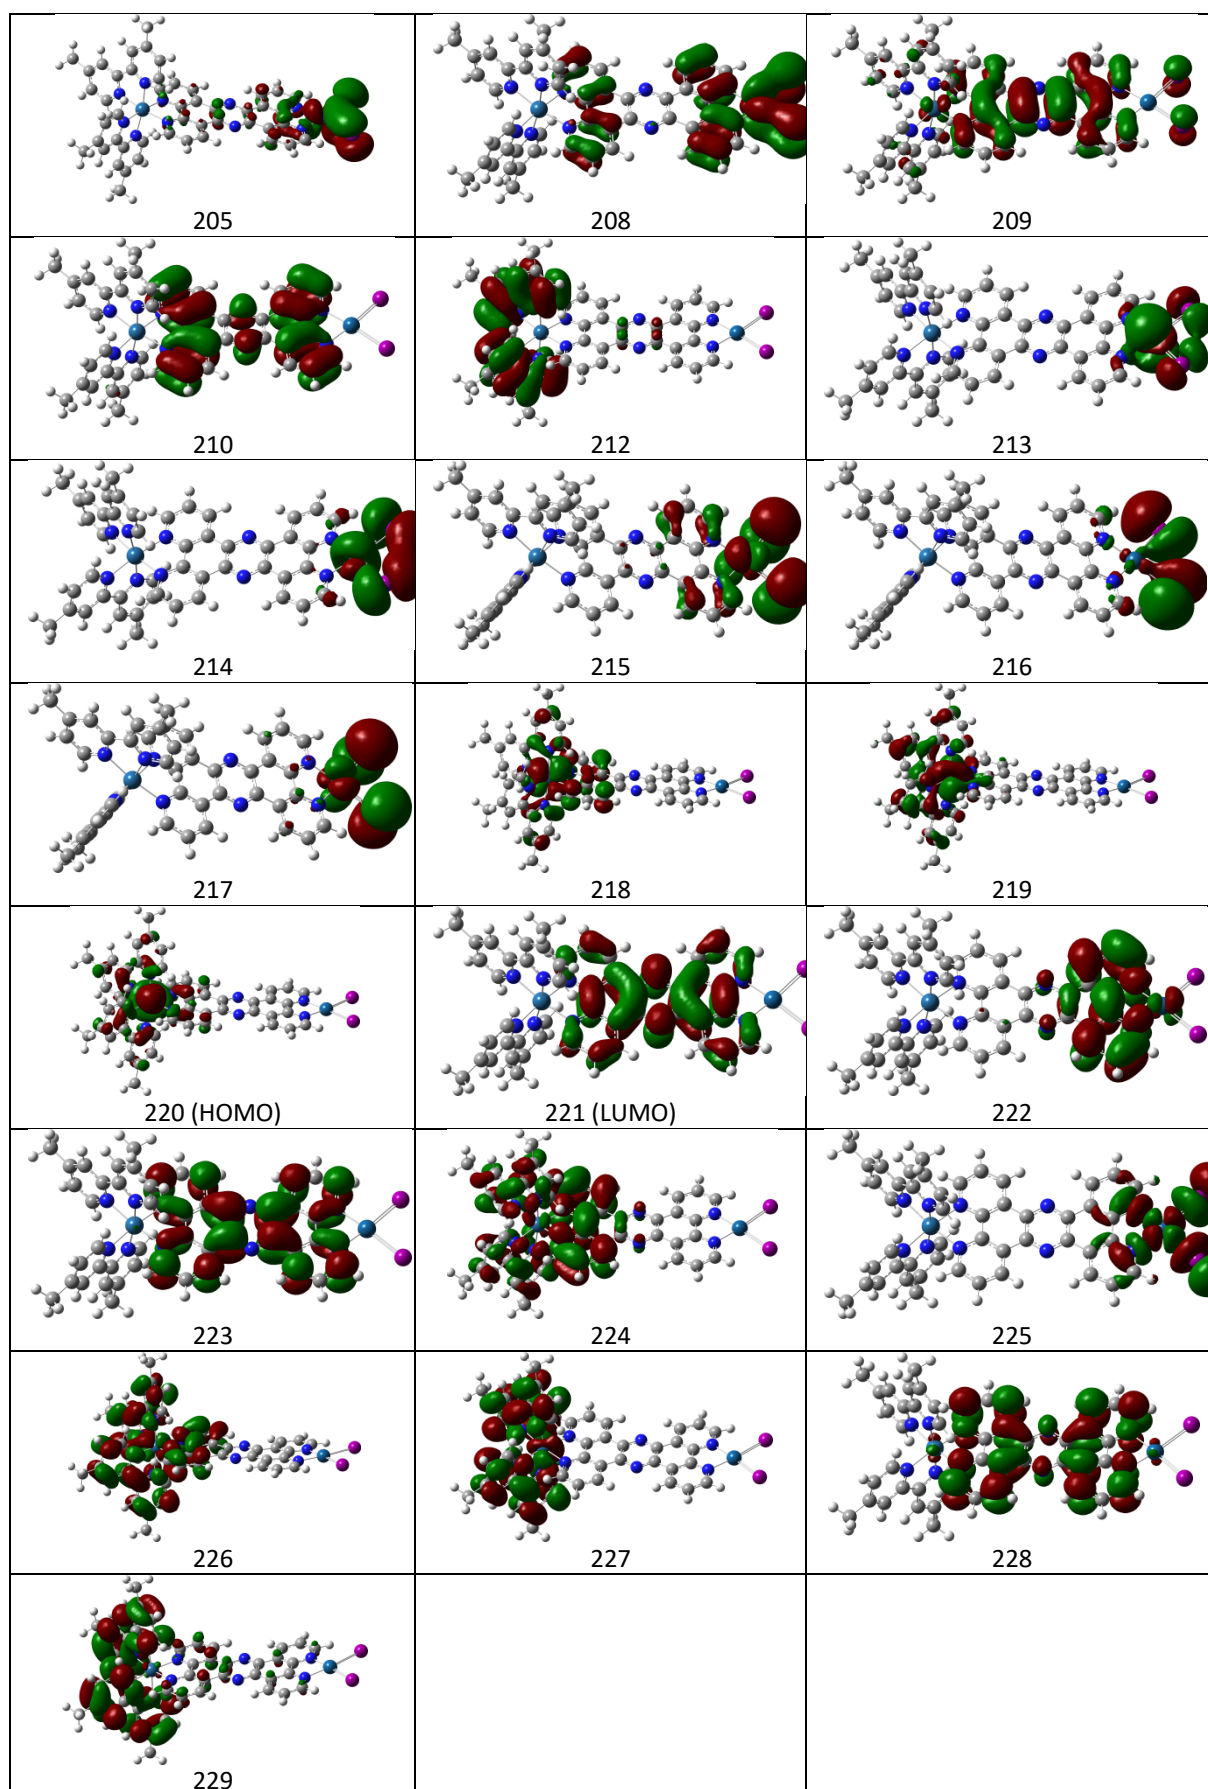



**Table S7.** Orbitals of **Ostp-phz**

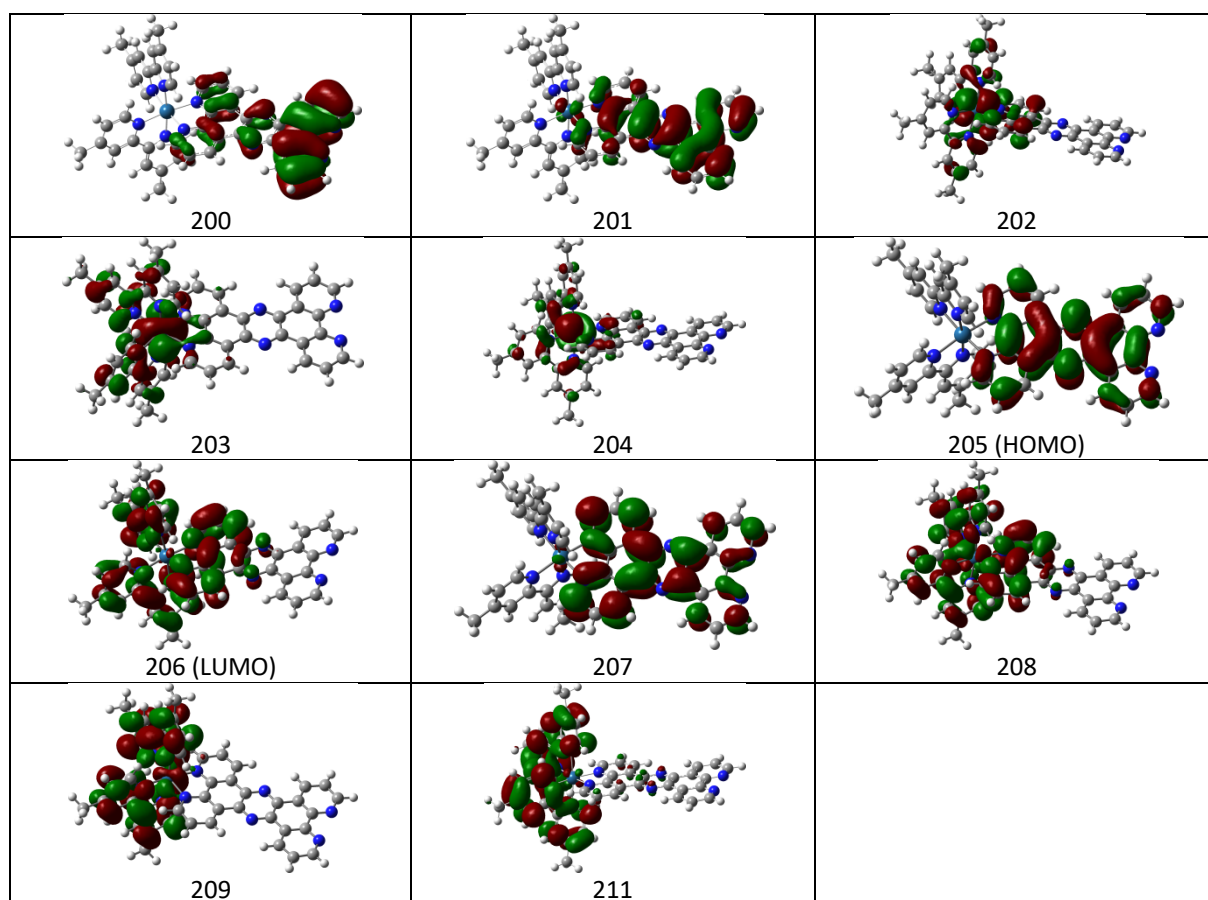

**Table S8.** Orbitals of RuPt

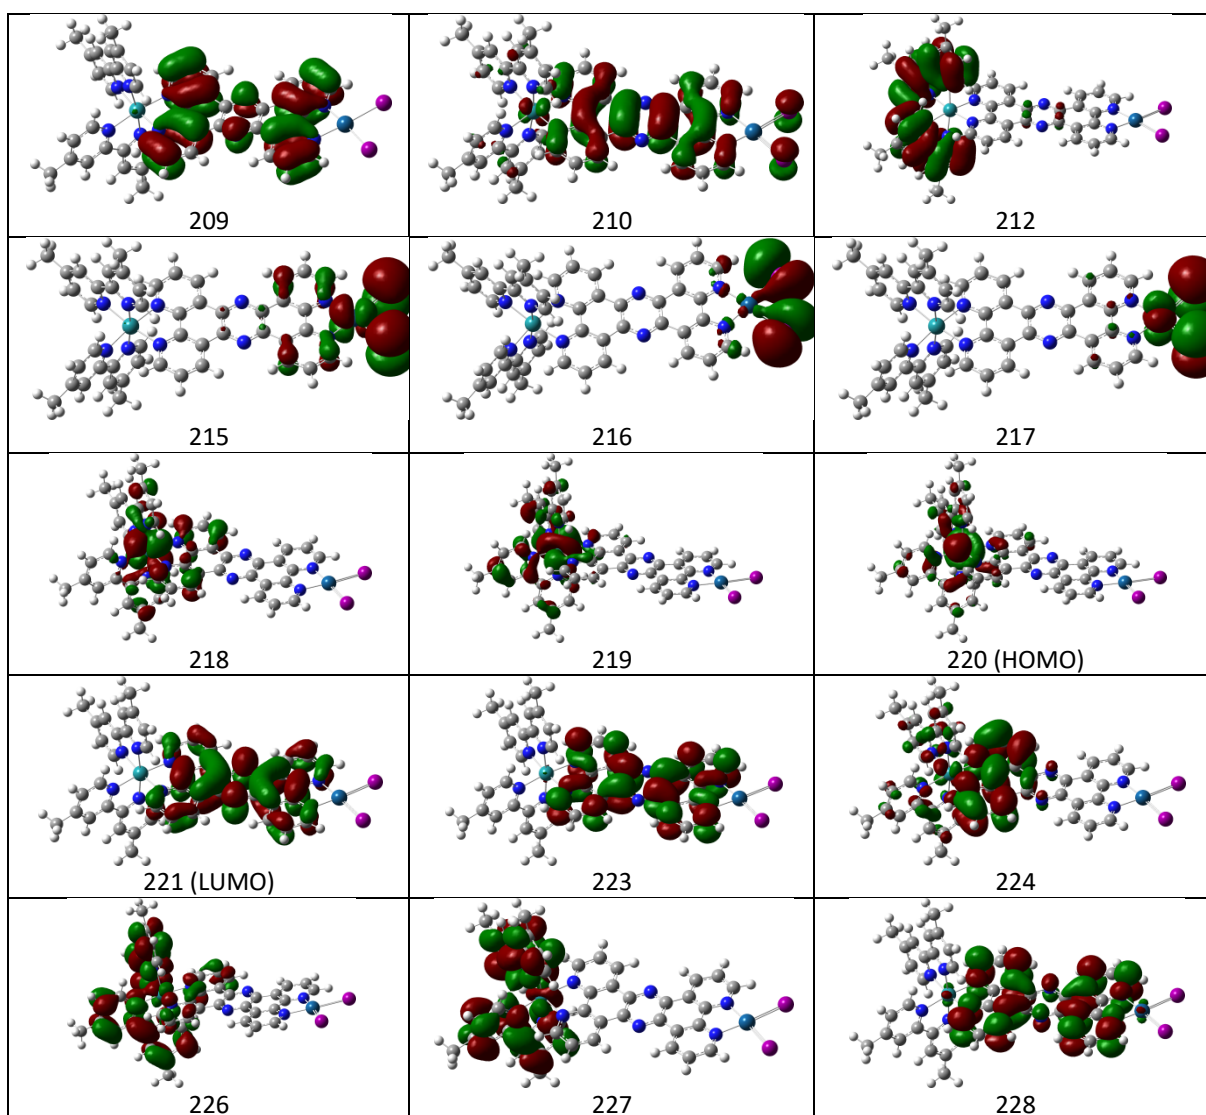

**Table S9.** Orbitals of **Rutpphz**

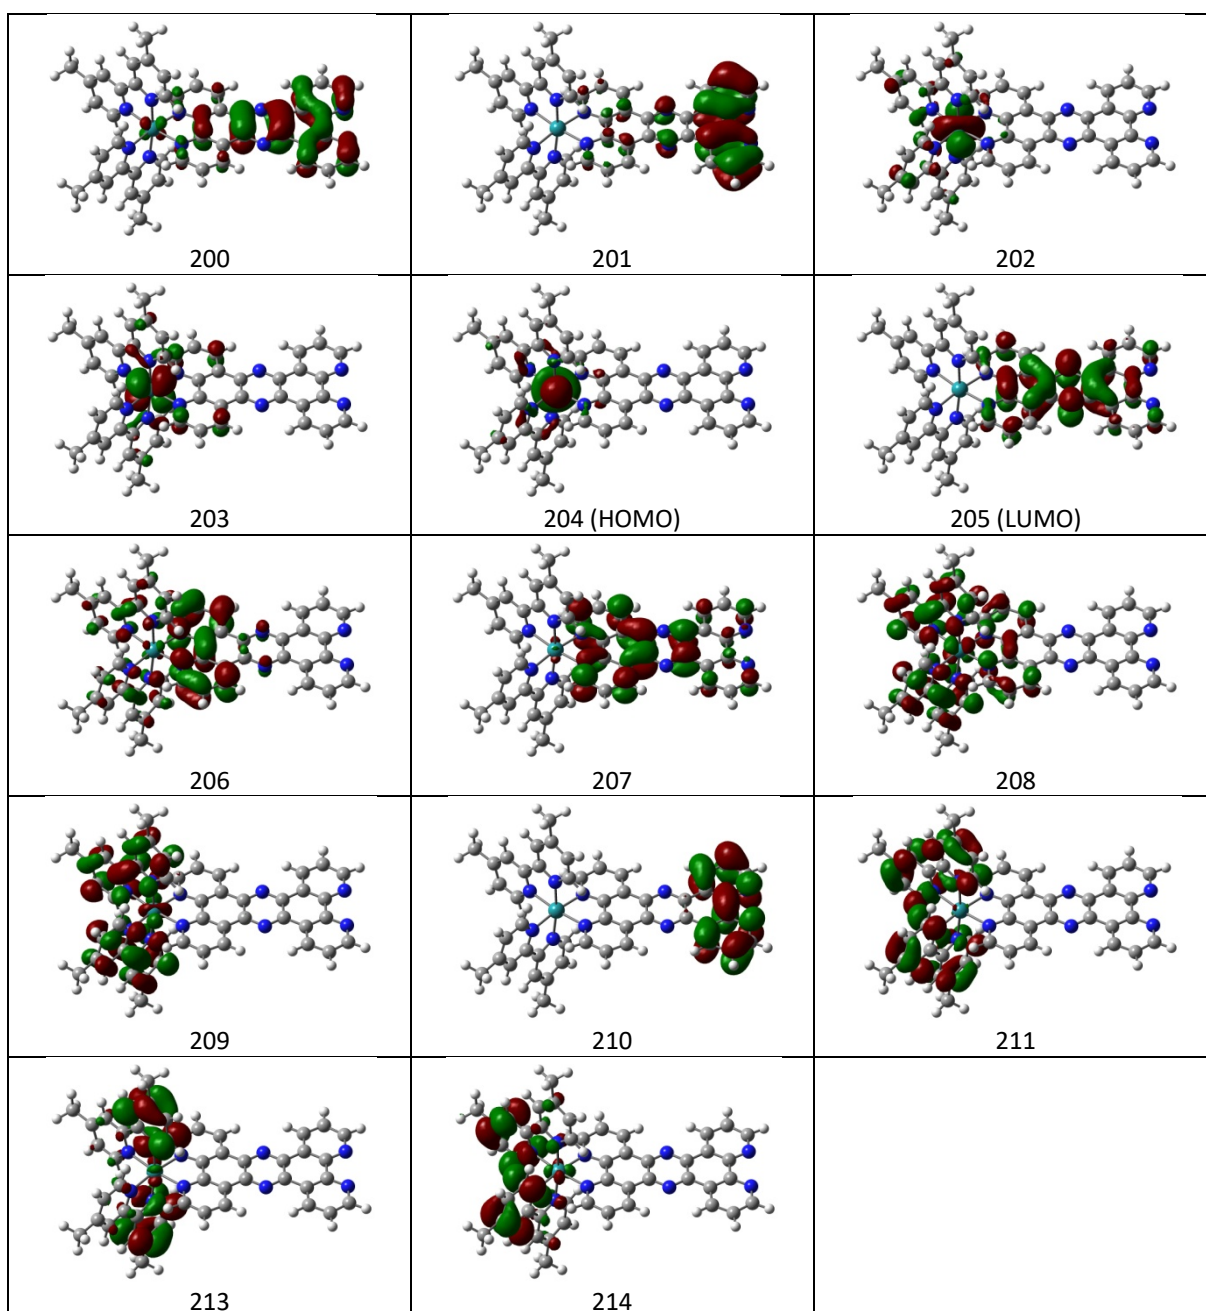

Supplement: c9se00304e1.pdf [file c9se00304e1.pdf]
